# Supplementary material for: Transparent and flexible resins functionalized by lanthanide-based upconversion nanocrystals
Source: Royal Society of Chemistry journal article supplement (doi:10.1039/d1dt00786f), 2021-01-01
Supplement: d1dt00786f1.pdf [file d1dt00786f1.pdf]

Electronic Supplementary Material(ESI) for Dalton Transactions. This  
journal is © The Royal Society of Chemistry 2021

**Supplementary Information for**

**Transparent and flexible resins functionalized by lanthanide-based  
upconversion nanocrystals**

*Yao Wang<sup>#a,b</sup>, Jingxiang Low<sup>#a</sup>, Yafei Bi<sup>a</sup>, Yu Bai<sup>a</sup>, Yonghu Chen<sup>a</sup>, Ran Long<sup>\*a</sup>, Yujie  
Xiong<sup>\*a,b</sup>*

*<sup>a</sup>Hefei National Laboratory for Physical Sciences at the Microscale, iChEM  
(Collaborative Innovation Center of Chemistry for Energy Materials), National  
Synchrotron Radiation Laboratory, and School of Chemistry and Materials Science,  
University of Science and Technology of China, Hefei, Anhui 230026, P. R. China.*

*<sup>b</sup>Institute of Energy, Hefei Comprehensive National Science Center, Hefei, Anhui  
230031, P. R. China*

<sup>#</sup>These authors contributed equally to this work.

\*Corresponding author: Tel: 86-551-63606657. Fax: 86-551-63606657;

\*Email: [yjxiong@ustc.edu.cn](mailto:yjxiong@ustc.edu.cn); [longran@ustc.edu.cn](mailto:longran@ustc.edu.cn).

## **Experimental section**

### **Synthesis of NaGdF<sub>4</sub>:Yb,Er UCNCs.**

NaGdF<sub>4</sub>:Yb,Er UCNCs were synthesized by thermal decomposition method according to the previous report<sup>1</sup>. The oleic acid (OA) and 1-octadecene (ODE) were utilized as the coordinating ligand and non-coordinating solvent, respectively. In a typical preparation of NaGdF<sub>4</sub>:Yb,Er UCNCs, 1 mmol Ln(CF<sub>3</sub>COO)<sub>3</sub> (0.78 mmol Gd<sup>3+</sup>, 0.20 mmol Yb<sup>3+</sup>, 0.02 mmol Er<sup>3+</sup>) and CF<sub>3</sub>COONa were combined with OA (6.4 mL) and ODE (12.8 mL) in a three-neck flask. The mixture was heated at 110 °C for 40 min to obtain a transparent solution, and residual water and oxygen were removed by vacuum. Subsequently, it was further heated to 300 °C under Ar flow for 1 h. Finally, the resultant white products can be collected through centrifugation with cyclohexane/alcohol (1:1) several times.

### **Synthesis of NaGdF<sub>4</sub>:Yb,Tm UCNCs.**

NaGdF<sub>4</sub>:Yb,Tm nanoparticles were synthesized via a similar procedure except that 1 mmol Ln(CF<sub>3</sub>COO)<sub>3</sub> (0.795 mmol Gd<sup>3+</sup>, 0.20 mmol Yb<sup>3+</sup>, 0.005 mmol Tm<sup>3+</sup>) was used during the preparation.

### **Synthesis of content-dependent Au/NaGdF<sub>4</sub>:Yb,Er hybrids.**

Au-modified NaGdF<sub>4</sub>:Yb,Er (Au/NaGdF<sub>4</sub>:Yb,Er) UCNCs were synthesized with a simple reduction method<sup>2</sup>, and the ascorbic acid (AA) and poly(vinylpyrrolidone) (PVP) were chosen as reducing agent and capping agent. 25 mg of the prepared NaGdF<sub>4</sub>:Yb,Er UCNCs were dispersed in 10 mL H<sub>2</sub>O, and mixed with 2 mL PVP<sub>55000</sub> solution (2.4 mM) under magnetic stirring. Then 10 mM HAuCl<sub>4</sub> with different volumes were added to the mixture. Finally, Au/NaGdF<sub>4</sub>:Yb,Er could be obtained after the addition of 0.9 mL 100 mM AA into the solution and reaction for 30 min. The contents of the Au were set to be 0.08 wt% (Au (0.08%)/NaGdF<sub>4</sub>:Yb,Er), 0.16 wt% (Au (0.16%)/NaGdF<sub>4</sub>:Yb,Er), 0.47 wt% (Au (0.47%)/NaGdF<sub>4</sub>:Yb,Er) and 0.63 wt% (Au (0.63%)/NaGdF<sub>4</sub>:Yb,Er).

### **UCNCs-functionalized PE slices.**

UCNCs-functionalized PE slices were synthesized using the hot compaction method under 140 °C<sup>3</sup>. Typically, the PE resins were adequately mixed with Au/NaGdF<sub>4</sub>:Yb,Er following the ratio of 50:1. Then the mixtures were fused under 140 °C for 4 min and vacuumed several times to reduce bubbles, and then further moulded under 6 MPa pressure. These final doped PE slices were shaped up in round tablets with a radius of 4.5 mm and thickness

of 1 mm. The NaGdF<sub>4</sub>:Yb,Tm functionalized PE resins were also prepared using a PE to NaGdF<sub>4</sub>:Yb,Tm ratio of 20:1.

#### **Flexible UCNCs-functionalized PDMS resins.**

UCNCs-functionalized PDMS resins were synthesized according to the previous work<sup>4</sup>. The 3.5 mg Au (0.16%)/NaGdF<sub>4</sub>:Yb,Er hybrid was dispersed into 2 mL curing agent by sonication. The epoxy resin was added to the mixture with a volume ratio of 8:1 and then loaded onto the PDMS resins with a diameter of 3.5 cm and different thicknesses of 2, 3, 4 and 5 mm. The final molarity of UCNCs was about 0.76 mM in resins. Subsequently, the mold was heated at 80 °C for 10 h to cure the epoxy.

#### **Material characterization.**

Transmission electron microscopy (TEM) images were taken on a Hitachi Model H-7700 microscopy at an accelerating voltage of 100 kV.

High-resolution TEM (HRTEM) image and elemental mapping profiles were recorded by the field-emission high-resolution transmission electron microscope assembled with the energy dispersive x-ray spectrometry (EDX) systems (JEOL JEM-2100F) and operated at 200 kV.

Powder X-ray diffraction (XRD) patterns were recorded with a Philips X'Pert Pro Super X-ray diffractometer with Cu-K $\alpha$  radiation ( $\lambda = 1.5418 \text{ \AA}$ ).

Ultraviolet-visible-near-infrared (UV-vis-NIR) absorption spectra were collected in the spectral region of 300-2000 nm with a Shimadzu SolidSpec-3700 spectrophotometer.

#### **Quantitative characterization of photoluminescence (PL) spectra.**

This quantitative characterization of PL spectra was realized according to our prior method<sup>5</sup>. In detail, powder samples in the groove (3×3×1 mm<sup>3</sup>) on the silicon wafer were used to ensure the same thickness and area. The laser spot size ( $\approx 1 \times 2 \text{ mm}^2$ ) was fixed during the measurement to ensure that the interaction volume and laser intensity were consistent throughout the test. The position of the laser relative to the samples was identical during the measurements.

#### **Pump power-dependent UC emission.**

The calculation of pump power-dependent UC emission was according to the following relation<sup>6</sup>,

$$I_{PL} \propto P^n$$

where  $I_{\text{PL}}$  is the PL intensity,  $P$  is the pump laser power, and  $n$  is the slope value which represents the number of the laser photons under unsaturated conditions.

**Upconversion luminescence lifetime measurement.**

The upconversion luminescence lifetimes of Er ions were measured using a Tektronix TDS2024 digital storage oscilloscope and a tunable laser system (Model Opolette 355LD OPO system) was used as the excitation source (980 nm).

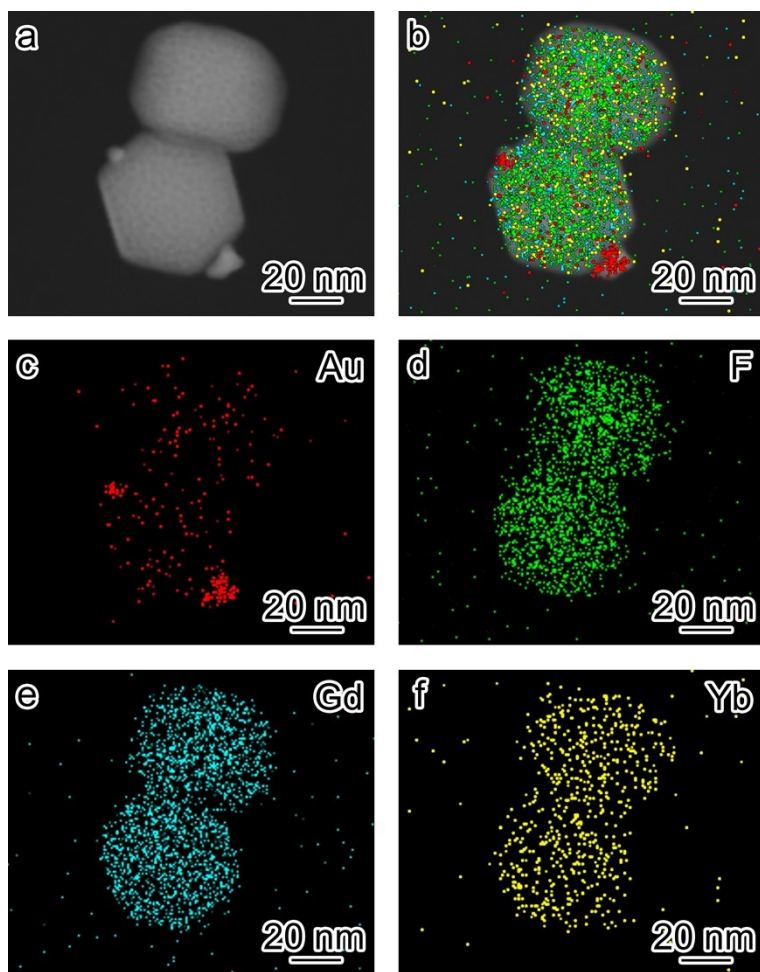

**Figure S1.** EDX elemental mapping profiles of Au/NaGdF<sub>4</sub>:Yb,Er nanostructures. (a) TEM image of Au/NaGdF<sub>4</sub>:Yb,Er nanostructures. (b) Merge image of elements. (c–f) Elemental mapping profiles of Au (c), F (d), Gd (e) and Yb (f) elements.

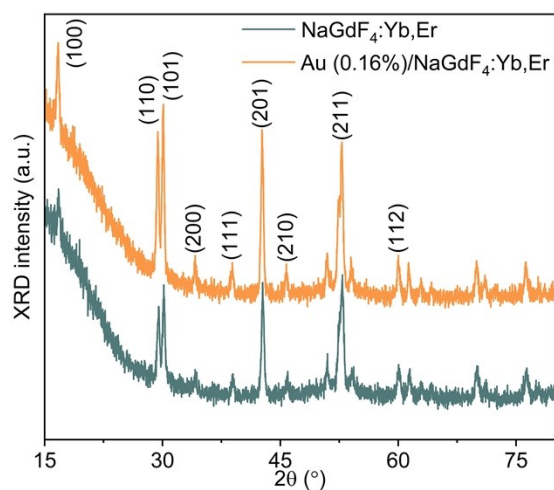

**Figure S2.** XRD patterns of NaGdF<sub>4</sub>:Yb,Er and Au (0.16%)/NaGdF<sub>4</sub>: Yb, Er hybrids.

Figure S1 shows the XRD patterns of NaGdF<sub>4</sub>:Yb,Er and Au-modified NaGdF<sub>4</sub>:Yb,Er. The characteristic peaks of both prepared samples match well with those for hexagonal NaGdF<sub>4</sub> (standard PDF#27-0699).

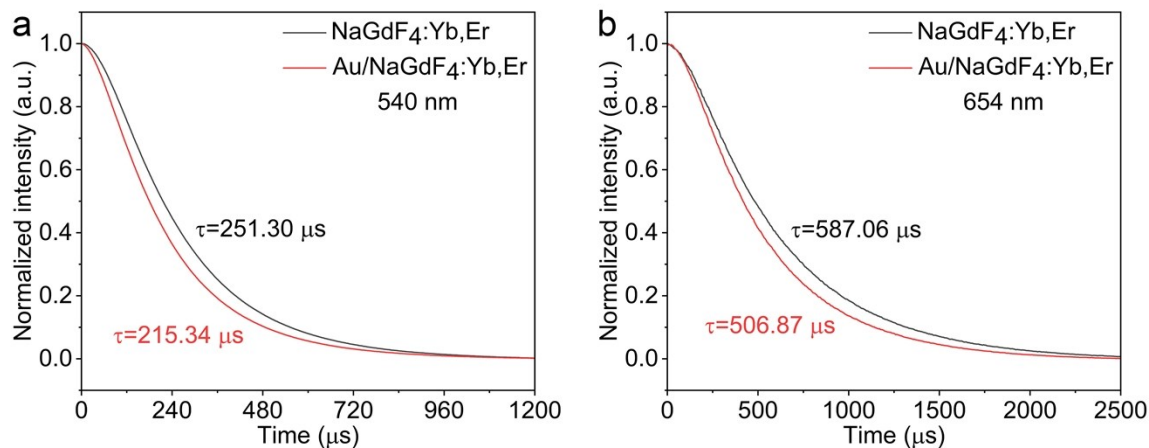

**Figure S3.** Upconversion luminescence lifetimes of NaGdF<sub>4</sub>:Yb,Er with and without Au nanocrystals under 980 nm excitation. (a) Luminescence lifetimes of Er ions on green band (~540 nm). (b) Luminescence lifetimes of Er ions on red band (~654 nm).

Lifetime ( $\tau$ ) can be obtained from the fitting results using the single exponential function<sup>7</sup>:

$$I(t) = I_0 \exp(-t/\tau),$$

where  $I_0$  is the initial emission intensity at  $t = 0$ . The decreases of luminescence lifetimes can be observed in both green band (from 251 to 215 μs) and red band (from 587 to 507 μs), demonstrating the enhanced excitation and radiative rates of Er ions induced by the plasmonics effect of Au nanocrystals.

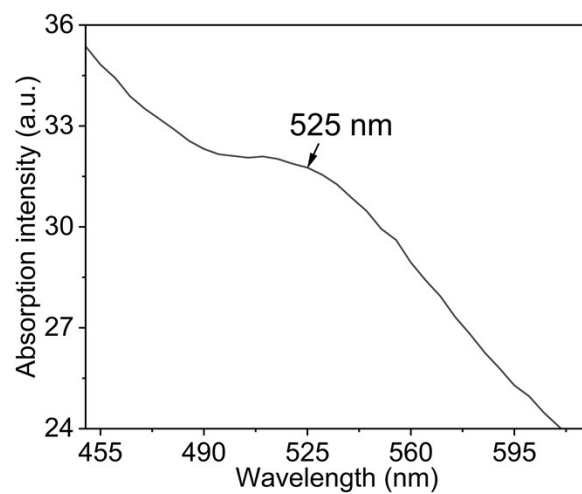

**Figure S4.** UV-vis-NIR absorption spectrum of pure Au nanocrystals.

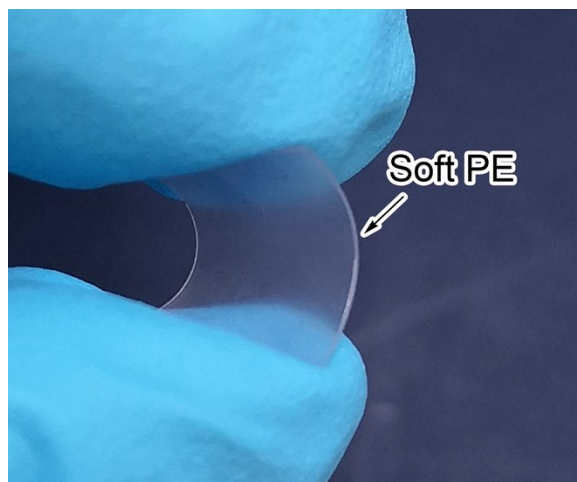

**Figure S5.** Photograph image of the PE resin after bending.

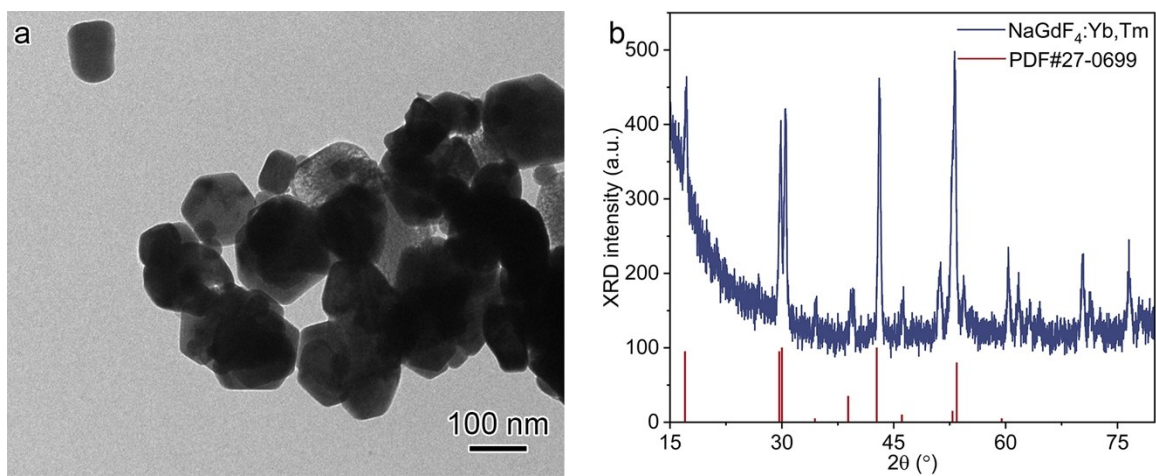

**Figure S6.** (a) TEM image of NaGdF<sub>4</sub>:Yb,Tm nanostructures. (b) XRD pattern of NaGdF<sub>4</sub>:Yb,Tm UCNCs and the standard diffraction pattern of hexagonal NaGdF<sub>4</sub> (PDF#27-0699).

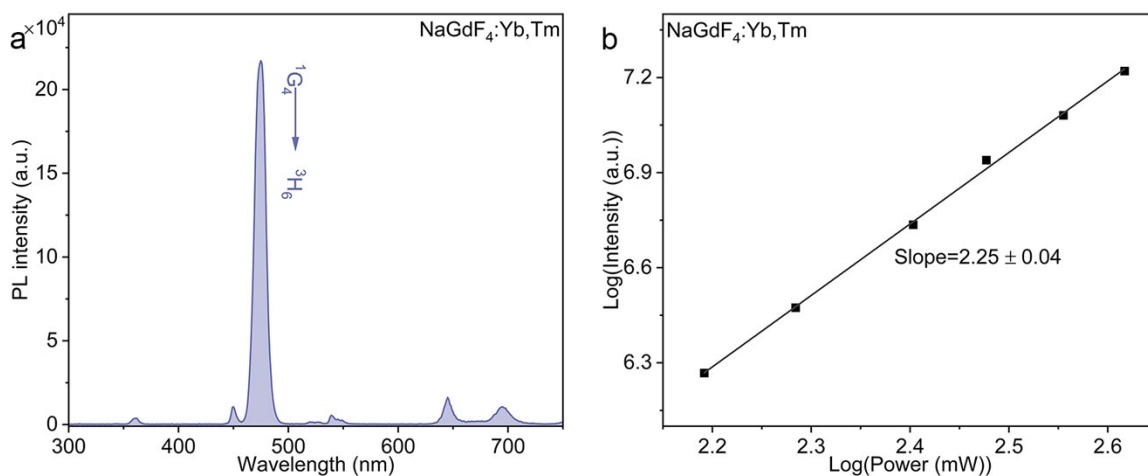

**Figure S7.** (a) UC emission spectra of NaGdF<sub>4</sub>:Yb,Tm UCNCs excited under 980 nm laser irradiation. The blue band (around 475 nm) is attributed to the <sup>1</sup>G<sub>4</sub> → <sup>3</sup>H<sub>6</sub> transitions. (b) Pump power-dependent UC emission of NaGdF<sub>4</sub>:Yb,Tm from 155.5 to 414 m W under 980 nm pump irradiation.

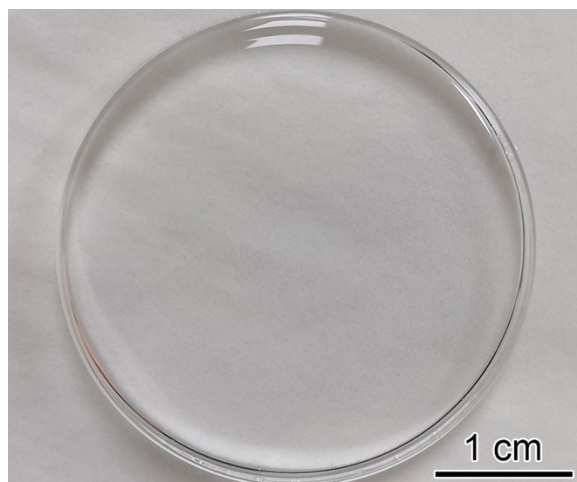

**Figure S8.** Photograph image of transparent PDMS resin with a diameter of 3.5 cm.

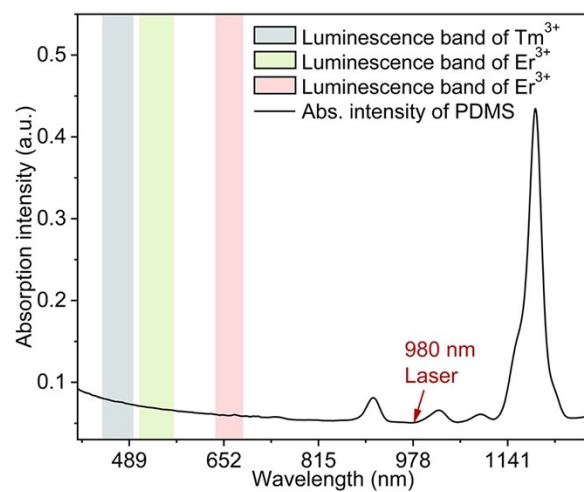

**Figure S9.** UV-vis-NIR absorption spectrum of PDMS resin.

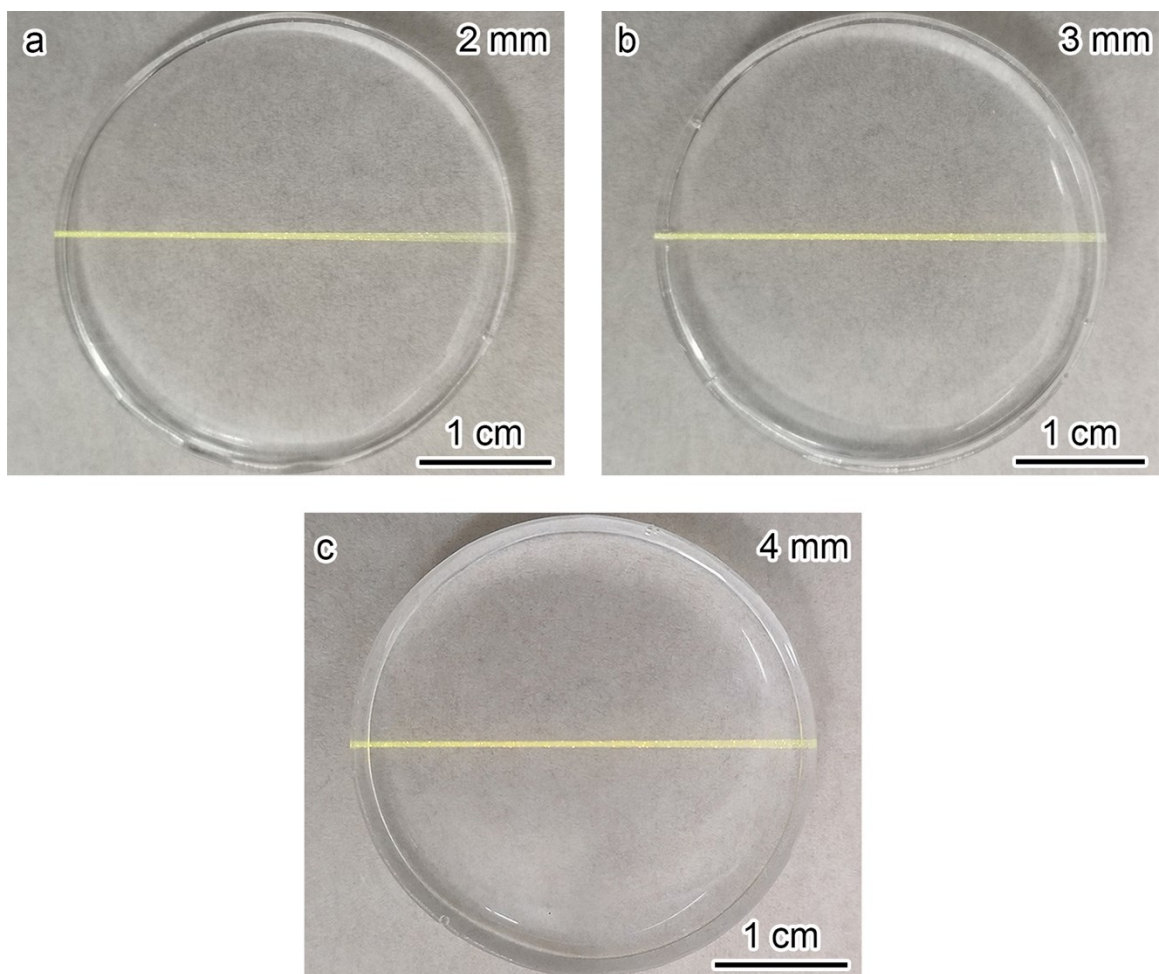

**Figure S10.** Emission image of Au (1.6%)/NaGdF<sub>4</sub>:Yb,Er-modified PDMS resins with (a) 2 mm, (b) 3 mm and (c) 4 mm thickness under 980 nm laser (3 W) irradiation.

**Table S1.** Partial data of absorption peaks in Fig. S9.

| Absorption band | Position/nm | Abs. intensity |
|-----------------|-------------|----------------|
| Peak 1          | 475         | 0.0758         |
| Peak 2          | 670         | 0.0604         |
| Peak 3          | 742         | 0.0578         |
| Peak 4          | 909         | 0.0811         |
| Peak 5          | 1022        | 0.0658         |
| Peak 6          | 1094        | 0.0609         |
| Peak 7          | 1189        | 0.4346         |

Fig. S9 shows that the main absorption band of PDMS resin is located around 1189 nm, and shows negligible absorption at the wavelength of 980 nm. Therefore, it can be a perfect substrate for our study on UCNCs using a 980 nm light irradiation. The detailed data are converted into Table S1 for ease of comparison.

## References

1. Y. Liu, D. Wang, J. Shi, Q. Peng and Y. Li, *Angew. Chem.*, 2013, **52**, 4366-4369.
2. Q. F. Zhou, J. C. Bao and Z. Xu, *J. Mater. Chem.*, 2002, **12**, 384-387.
3. P. J. Hine, I. M. Ward, R. H. Olley and D. C. Bassett, *J. Mater. Sci.*, 1993, **28**, 316-324.
4. W. Chen, Z. Wang, C. Zhi and W. Zhang, *Compos. Sci. Technol.*, 2016, **130**, 63-69.
5. L. Wang, X. Li, Z. Li, W. Chu, R. Li, K. Lin, H. Qian, Y. Wang, C. Wu, J. Li, D. Tu, Q. Zhang, L. Song, J. Jiang, X. Chen, Y. Luo, Y. Xie and Y. Xiong, *Adv. Mater.*, 2015, **27**, 5528-5533.
6. G. Chen, T. Y. Ohulchanskyy, W. C. Law, H. Agren and P. N. Prasad, *Nanoscale*, 2011, **3**, 2003-2008.
7. N. Liu, W. Qin, G. Qin, T. Jiang and D. Zhao, *Chem. Commun.*, 2011, **47**, 7671-7673.
